# Supplementary material for: 3D Bioprinting of Novel Biocompatible Scaffolds for Endothelial Cell Repair
Source: PubMed Central journal article supplement (PMC6960937; doi:10.3390/polym11121924), 2019-11-22
Supplement: polymers-11-01924-s001.pdf [file polymers-11-01924-s001.pdf]

# 3D bioprinting of novel biocompatible scaffolds for endothelial cell repair

Yan Wu<sup>1</sup>, Lamia Heikal<sup>2,3</sup>, Gordon Ferns<sup>2</sup>, Pietro Ghezzi<sup>2</sup>, Ali Nokhodchi<sup>1,4\*</sup>, Mohammed Maniruzzaman<sup>5</sup> and \*

<sup>1</sup> Department of Pharmacy (Chemistry), School of Life Sciences, University of Sussex, Falmer, Brighton, BN1 9QJ

<sup>2</sup> Brighton and Sussex Medical School, Falmer, Brighton, BN1 9RH

<sup>3</sup> Faculty of Pharmacy, Department of Pharmaceutics. Alexandria University, Egypt

<sup>4</sup> Drug Applied Research Center and Faculty of Pharmacy, Tabriz University of Medical Sciences, Iran

<sup>5</sup> Pharmaceutical Engineering and 3D Printing (PharmE3D) Lab, Division of Molecular Pharmaceutics and Drug Delivery, College of Pharmacy, University of Texas at Austin, 2409 University Avenue, A1920, Austin, Texas, 78712, USA

\* **Correspondence:** M Maniruzzaman: M.Maniruzzaman@austin.utexas.edu ;M.Maniruzzaman12@gmail.com, and A. Nokhodchi: A.Nokhodchi@sussex.ac.uk

**Supplementary Data:**

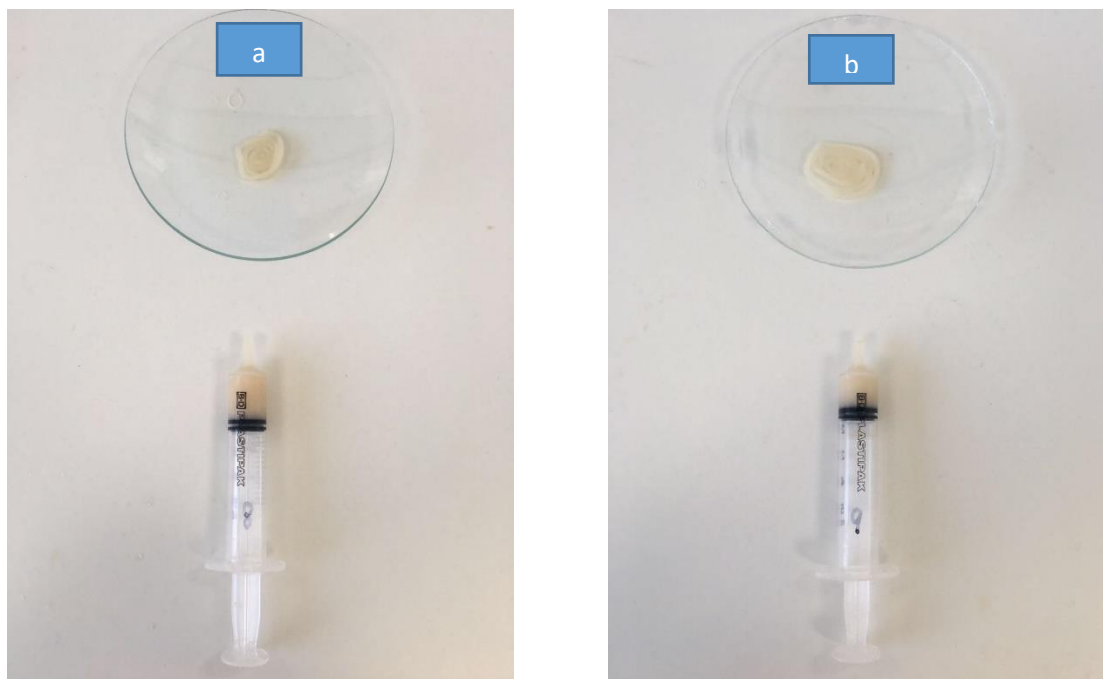

**Supp. Fig. 1:** Syringability tests of prepared bioinks containing (a-b) PLA/PEG.

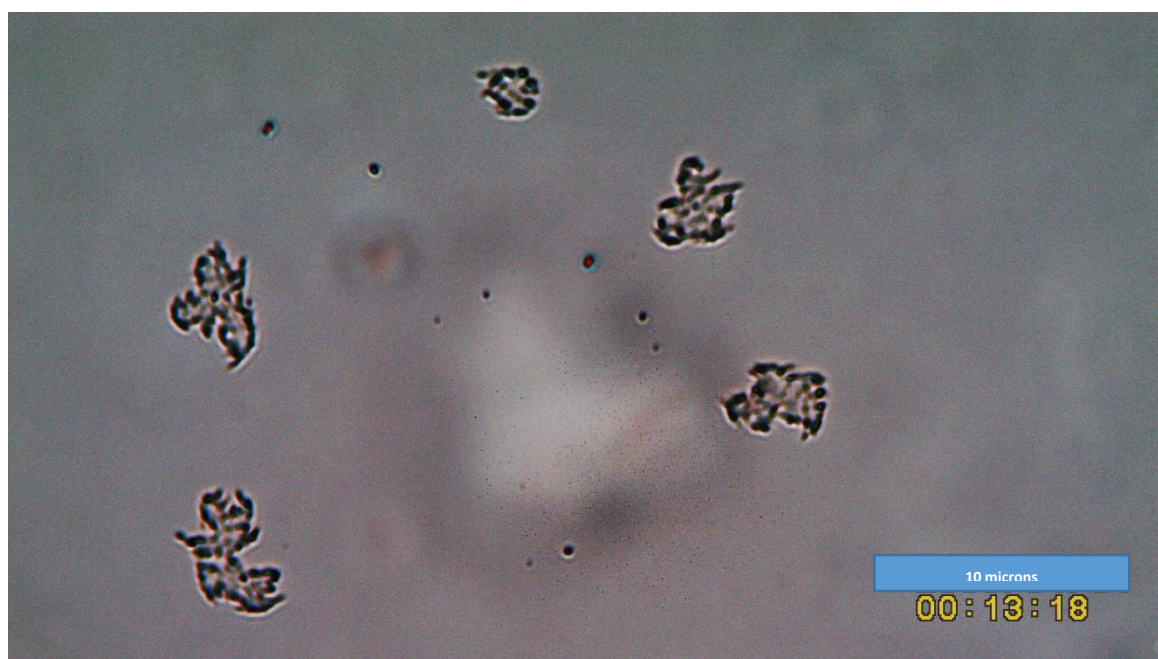

**Supp. Fig. 2:** Texture of the prepared homogenous bioinks in high magnification (F127/drug).

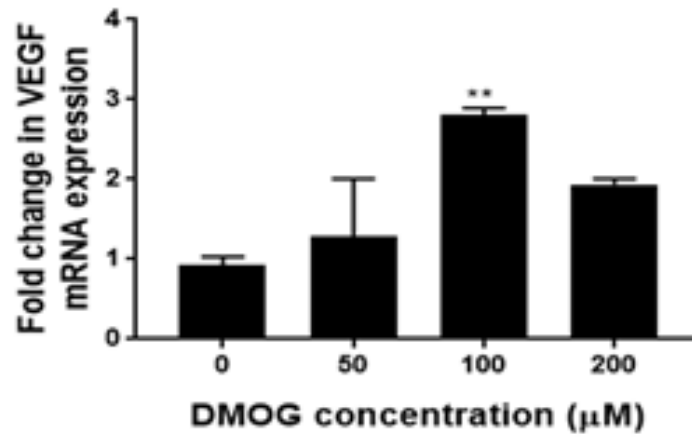

**Supp. Fig. 3:** Fold change in VEGF gene expression in cell lysates after treating rat aortic endothelial cells with standard DMOG solution added in a concentration of 100 μM.
